# Supplementary material
Source: Springer Nature journal article supplement (http://www.springermedizin.de/resource/supplementary/12974_2010_288_MOESM8_ESM.pdf/9601170)

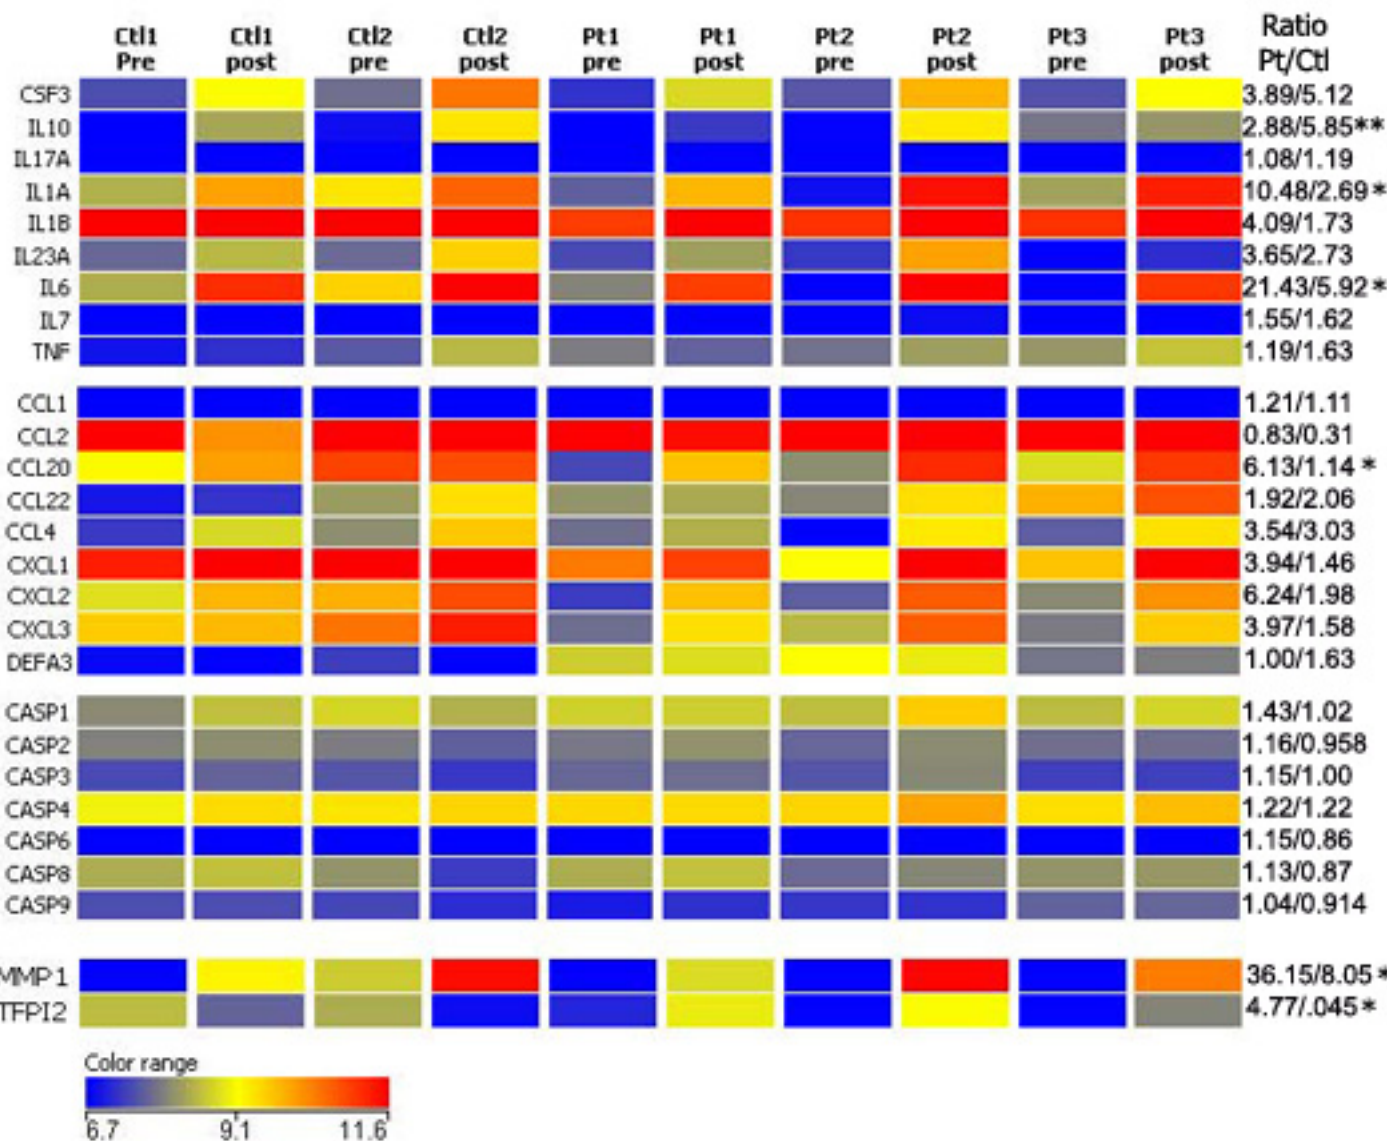

\* 4 fold increase in patients > controls

\*\* 2 fold increase in controls > patients

Supplement: MOESM8 [file 9601170]
